# Supplementary material for: Serological Profile for Major Respiratory Viruses in Unvaccinated Cows from High-Yielding Dairy Herds
Source: MDPI journal article supplement (doi:10.3390/ani14091256), 2024-04-23
Supplement: s1 [file s1]

**Table S1.** Seropositive lactating cows per herd for BoAHV1, BVDV, BPIV3, and BRSV virus neutralizing antibodies distributed according to the type of management (A, B, and C) in dairy herds in Paraná, Brazil.

| Management type    | Herd | Samples (n) | % seropositive animals |                |                |                |
|--------------------|------|-------------|------------------------|----------------|----------------|----------------|
|                    |      |             | BoAHV1                 | BVDV           | BPIV3          | BRSV           |
| Extensive (A)      | A1   | 19          | 0 (0/19)               | 100 (19/19)    | 94.74 (18/19)  | 100 (19/19)    |
|                    | A2   | 2           | 0 (0/2)                | 0 (0/2)        | 0 (2/2)        | 0 (0/2)        |
|                    | A3   | 3           | 0 (0/3)                | 33.33 (1/3)    | 100 (3/3)      | 33.33 (1/3)    |
|                    | A4   | 20          | 25 (5/20)              | 10 (2/20)      | 95 (19/20)     | 10 (2/20)      |
| Subtotal           |      | 44          | 11.4 (5/44)            | 50 (22/44)     | 95.4 (42/44)   | 50 (22/44)     |
| Semi-intensive (B) | B1   | 20          | 20 (4/20)              | 100 (20/20)    | 100 (20/20)    | 100 (20/20)    |
|                    | B2   | 20          | 35 (7/20)              | 30 (6/20)      | 100 (20/20)    | 30 (6/20)      |
|                    | B3   | 8           | 100 (8/8)              | 75 (6/8)       | 100 (8/8)      | 62.5 (5/8)     |
|                    | B4   | 8           | 100 (8/8)              | 75 (6/8)       | 100 (8/8)      | 100 (8/8)      |
|                    | B5   | 8           | 100 (8/8)              | 62.5 (5/8)     | 100 (8/8)      | 87.5 (7/8)     |
|                    | B6   | 8           | 37.5 (3/8)             | 0 (0/8)        | 100 (8/8)      | 50 (4/8)       |
|                    | B7   | 8           | 12.5 (1/8)             | 0 (0/8)        | 100 (8/8)      | 0 (0/8)        |
|                    | B8   | 8           | 100 (8/8)              | 100 (8/8)      | 100 (8/8)      | 100 (8/8)      |
|                    | B9   | 8           | 75 (6/8)               | 37.5 (3/8)     | 100 (8/8)      | 50 (4/8)       |
|                    | B10  | 20          | 100 (20/20)            | 80 (16/20)     | 100 (20/20)    | 95 (19/20)     |
|                    | B11  | 3           | 66.67 (2/3)            | 33.33 (1/3)    | 100 (3/3)      | 100 (3/3)      |
|                    | B12  | 3           | 100 (3/3)              | 100 (3/3)      | 100 (3/3)      | 100 (3/3)      |
|                    | B13  | 3           | 33.33 (1/3)            | 100 (3/3)      | 100 (3/3)      | 100 (3/3)      |
|                    | B14  | 3           | 0 (0/3)                | 0 (0/3)        | 100 (3/3)      | 100 (3/3)      |
|                    | B15  | 3           | 0 (0/3)                | 0 (0/3)        | 66.67 (2/3)    | 100 (3/3)      |
| Subtotal           |      | 131         | 60.3 (79/131)          | 58.8 (77/131)  | 99.2 (130/131) | 73.3 (96/131)  |
| Intensive (C)      | C1   | 11          | 81.82 (9/11)           | 0 (0/11)       | 63.64 (7/11)   | 0 (0/11)       |
|                    | C2   | 19          | 100 (19/19)            | 94.74 (18/19)  | 94.74 (18/19)  | 100 (19/19)    |
|                    | C3   | 17          | 100 (17/17)            | 94.12 (16/17)  | 100 (17/17)    | 100 (17/17)    |
|                    | C4   | 19          | 100 (19/19)            | 78.95 (15/19)  | 100 (19/19)    | 94.74 (18/19)  |
|                    | C5   | 19          | 94.74 (18/19)          | 57.89 (11/19)  | 100 (19/19)    | 73.68 (14/19)  |
|                    | C6   | 18          | 94.44 (17/18)          | 72.22 (13/18)  | 100 (18/18)    | 72.22 (13/18)  |
|                    | C7   | 19          | 100 (19/19)            | 94.74 (18/19)  | 94.74 (18/19)  | 94.74 (18/19)  |
|                    | C8   | 18          | 83.33 (15/18)          | 88.89 (16/18)  | 100 (18/18)    | 88.89 (16/18)  |
|                    | C9   | 19          | 100 (19/19)            | 100 (19/19)    | 100 (19/19)    | 100 (19/19)    |
|                    | C10  | 19          | 100 (19/19)            | 31.58 (6/19)   | 100 (19/19)    | 52.63 (10/19)  |
|                    | C11  | 20          | 70 (14/20)             | 10 (2/20)      | 90 (18/20)     | 10 (2/20)      |
|                    | C12  | 20          | 100 (20/20)            | 0 (0/20)       | 95 (19/20)     | 0 (0/20)       |
|                    | C13  | 20          | 60 (12/20)             | 10 (2/20)      | 100 (20/20)    | 15 (3/20)      |
|                    | C14  | 8           | 62.5 (5/8)             | 75 (6/8)       | 100 (8/8)      | 75 (6/8)       |
|                    | C15  | 8           | 87.5 (7/8)             | 0 (0/8)        | 100 (8/8)      | 0 (0/8)        |
|                    | C16  | 8           | 100 (8/8)              | 75 (6/8)       | 100 (8/8)      | 100 (8/8)      |
|                    | C17  | 20          | 100 (20/20)            | 90 (18/20)     | 85 (17/20)     | 95 (19/20)     |
|                    | C18  | 19          | 0 (0/19)               | 5.26 (1/19)    | 94.74 (18/19)  | 5.26 (1/19)    |
|                    | C19  | 11          | 100 (11/11)            | 100 (11/11)    | 100 (11/11)    | 54.55 (6/11)   |
| Subtotal           |      | 312         | 85.9 (268/312)         | 57.1 (178/312) | 95.8 (299/312) | 60.6 (189/312) |
| Total              |      | 487         | 72.3 (352/487)         | 56.9 (277/487) | 96.7 (471/487) | 63.0 (307/487) |

BoAHV1 (Bovine alphaherpesvirus 1); BVDV (Bovine viral diarrhea virus); BPIV3 (Bovine parainfluenzavirus 3); BRSV (Bovine respiratory syncytial virus).
